# Supplementary material for: CXCL17-derived CD11b+Gr-1+ myeloid-derived suppressor cells contribute to lung metastasis of breast cancer through platelet-derived growth factor-BB
Source: Springer Nature journal article supplement (doi:10.1186/s13058-019-1114-3), 2019-02-12
Supplement: MOESM1 [file 16466414]

## **Additional files**

Additional file 1:

**Figure S1.** CXCL17 did not affect the cell proliferation and migration of breast cancer.

The effect of CXCL17 in the cell proliferation (A), colony formation (B) and cell migration. Results are representative of at least three independent experiments and each value is the mean  $\pm$  SD of three determinations; ns., no significant difference with control ( $p < 0.05$ ). (PDF, 200 kb).

**A**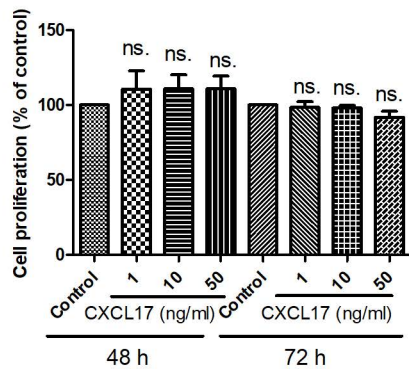**B**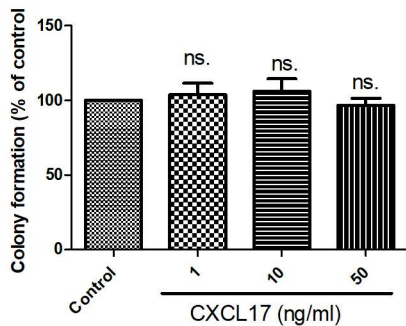**C**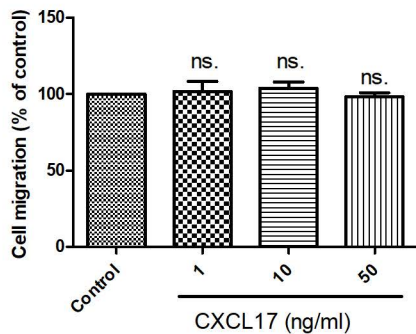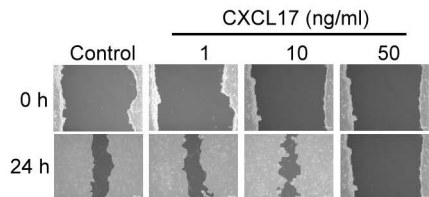**Figure S1**
